# Supplementary material for: Synthesis of two-dimensional N-terminated molybdenum carbides using an alloying strategy in molten salt
Source: Royal Society of Chemistry journal article supplement (doi:10.1039/d4ta03999h), 2024-01-01
Supplement: d4ta03999h1.pdf [file d4ta03999h1.pdf]

## Synthesis of two-dimensional N-terminated molybdenum carbides by alloying strategy in molten salt

Weiyan Jiang<sup>a,b,c,‡</sup>, Zihan Gao<sup>a,b,c,‡</sup>, Miao Shen<sup>a,b,c,\*</sup>, Rui Tang<sup>a,b,c</sup>, Jing Zhou<sup>d,\*</sup>,  
Chuanqiang Wu<sup>e</sup>, Linjuan Zhang<sup>a,b,c</sup>, Jian-Qiang Wang<sup>a,b,c,\*</sup>

<sup>a</sup> Shanghai Institute of Applied Physics, Chinese Academy of Sciences, Shanghai 201800, P.R. China

<sup>b</sup> University of Chinese Academy of Sciences, Beijing 100049, P.R. China

<sup>c</sup> Key Laboratory of Interfacial Physics and Technology, Chinese Academy of Sciences, Shanghai 201800, P.R. China

<sup>d</sup> Zhejiang Institute of Photoelectronics & Zhejiang Institute for Advanced Light Source, Zhejiang Normal University, Jinhua, Zhejiang 321004, P. R. China

<sup>e</sup> Information Materials and Intelligent Sensing Laboratory of Anhui Province, Key Laboratory of Structure and Functional Regulation of Hybrid Materials of Ministry of Education; Institutes of Physical Science and Information Technology, Anhui University, Hefei 230601, P.R. China

\* Corresponding Author

E-mail: shenmiao@sinap.ac.cn (M. Shen), zhoujing5457@zjnu.edu.cn (J. Zhou), wangjianqiang@sinap.ac.cn (J.-Q. Wang)

‡ These authors contributed equally to this work.

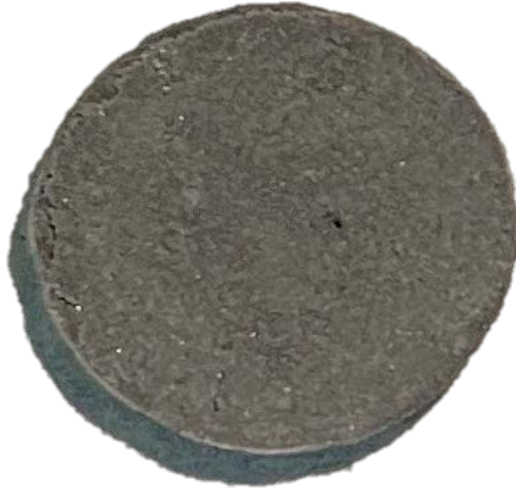

**Fig. S1** The pressed pellet sample (the diameter of 12 mm) of Ni/Li<sub>3</sub>N/Mo<sub>2</sub>Ga<sub>2</sub>C with KCl-LiCl molten salts.

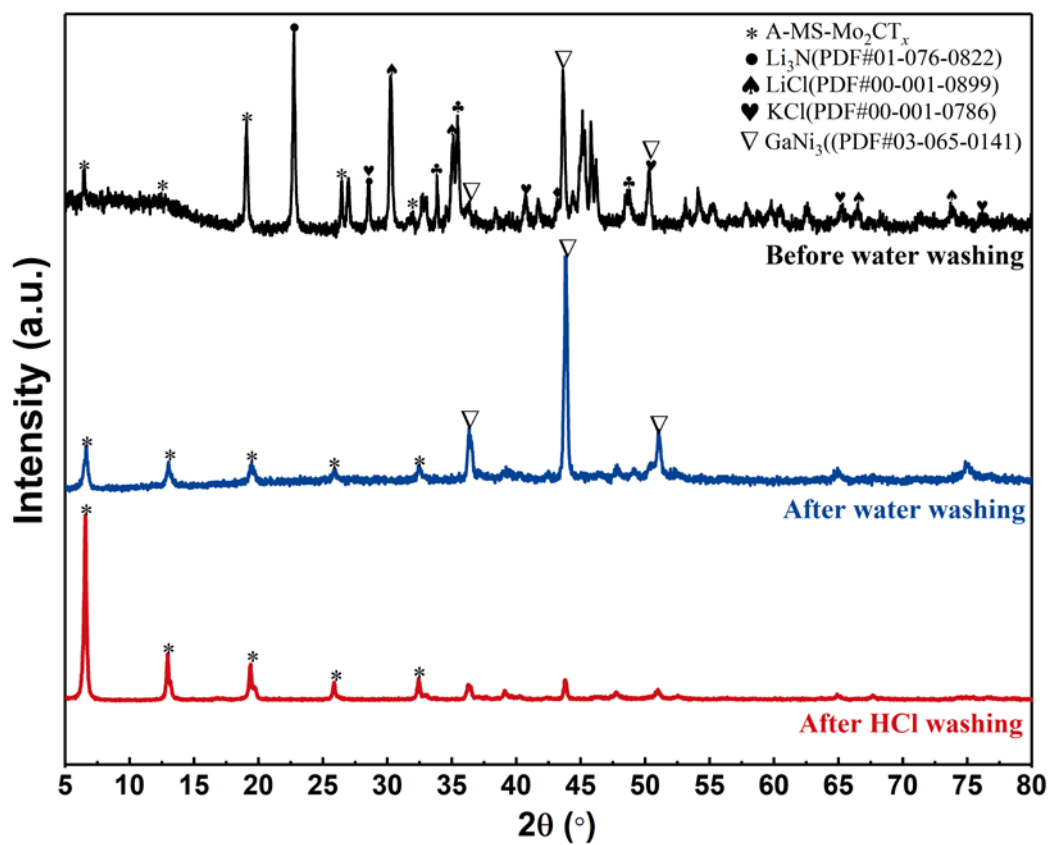

**Fig. S2** XRD of the products for Ni-Li<sub>3</sub>N-Mo<sub>2</sub>Ga<sub>2</sub>C-(KCl-LiCl) after reaction at 700°C and the products washed by deionized water and HCl.

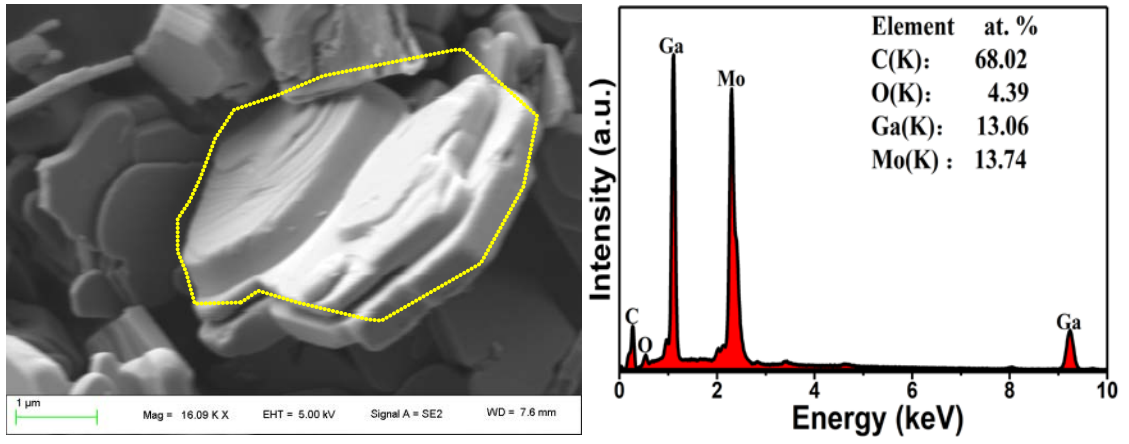

**Fig. S3** SEM mages and EDS data of Mo<sub>2</sub>Ga<sub>2</sub>C materials.

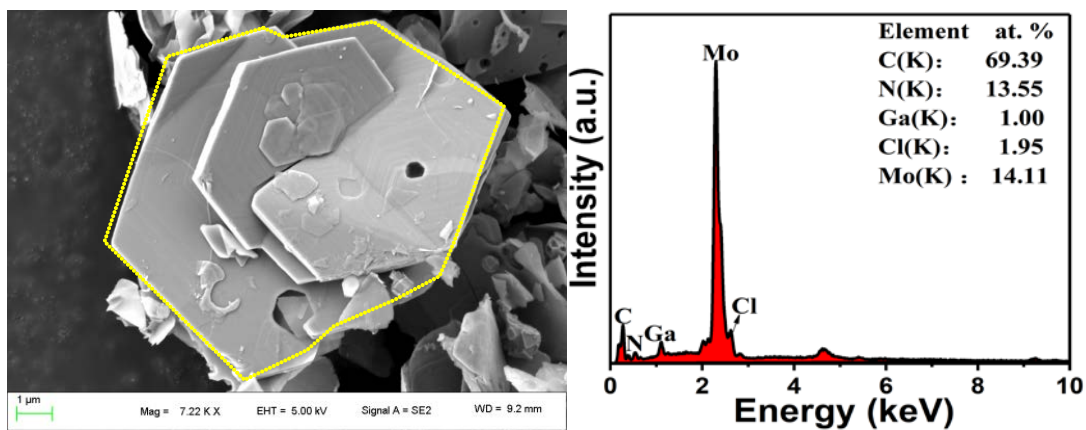

**Fig. S4** SEM mages and EDS of A-MS-Mo<sub>2</sub>CT<sub>x</sub>.

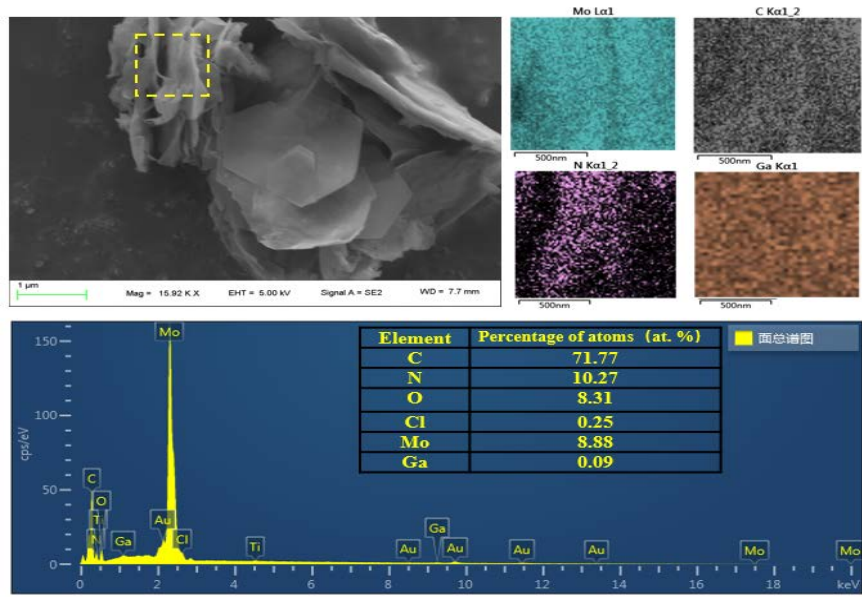

**Fig. S5** SEM and EDS of  $\text{Mo}_2\text{CT}_x$  sample etched at 48h.

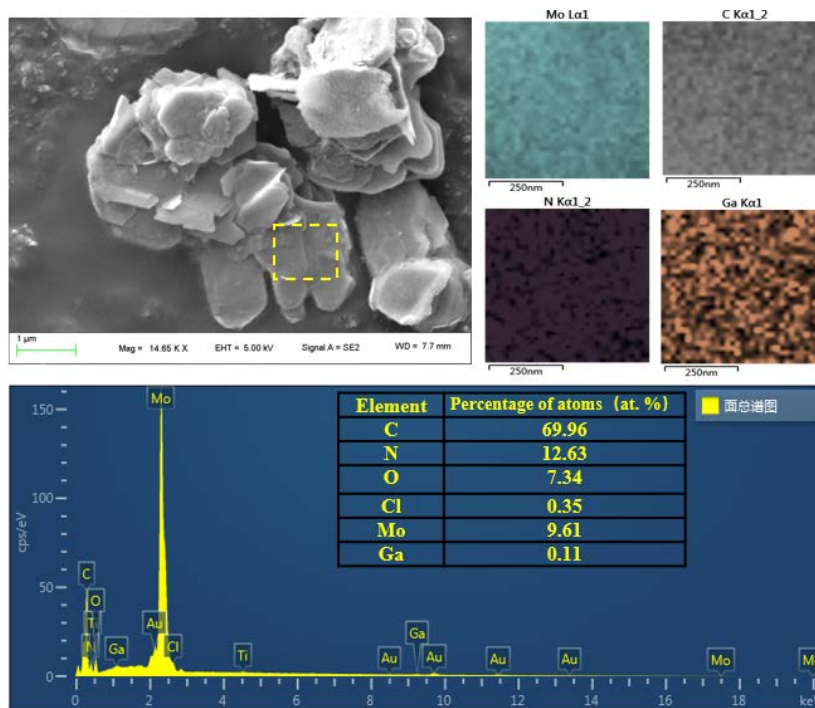

**Fig. S6** SEM and EDS of  $\text{Mo}_2\text{CT}_x$  sample etched at 800 °C.

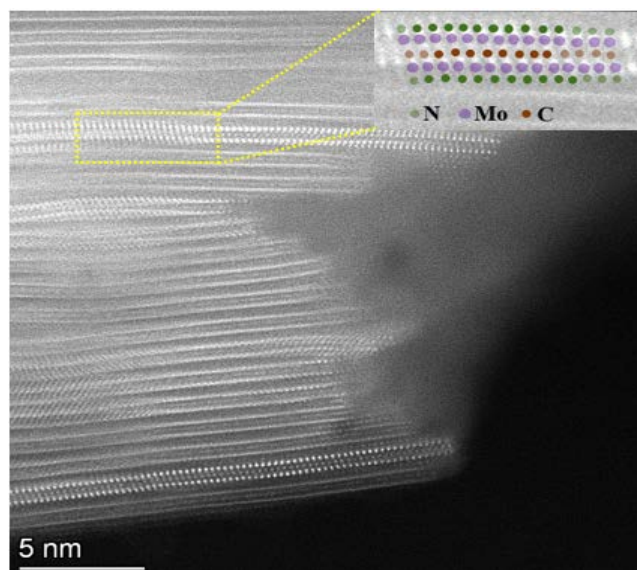

**Fig. S7** HAADF of A-MS-Mo<sub>2</sub>CT<sub>x</sub> nanoflakes.



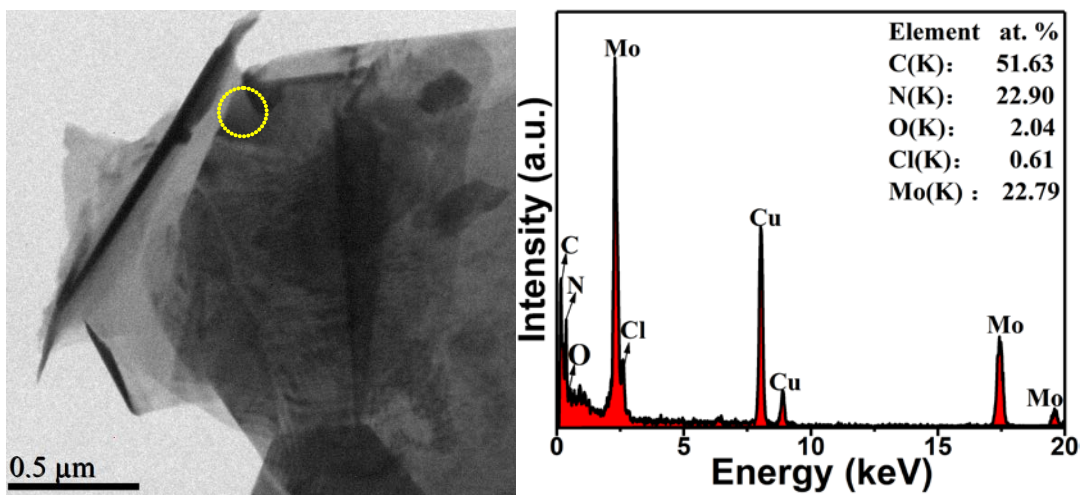

**Fig. S8** Atomic percentage distribution of elements and EDX of A-MS-Mo<sub>2</sub>CT<sub>x</sub> from TEM-EDX.

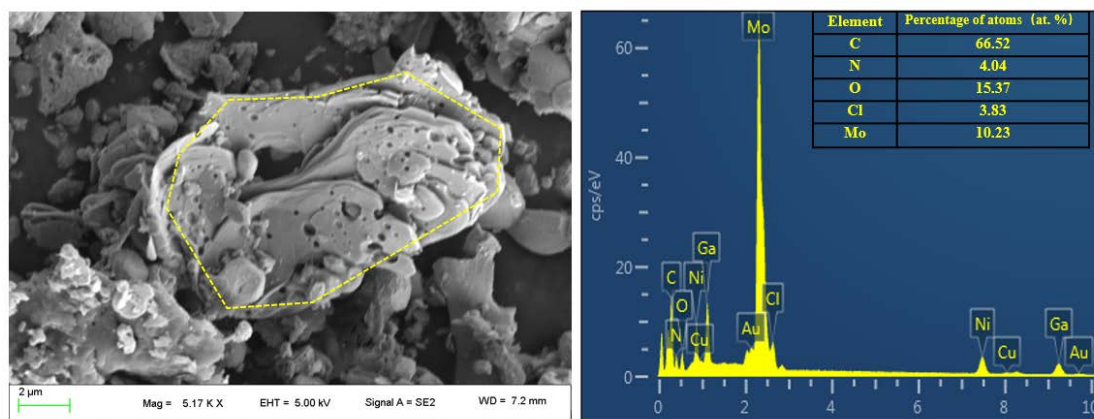

**Fig.S9** SEM images and EDS of  $\text{Mo}_2\text{CT}_x$  produced at 1:0.33 mass ratio of  $\text{Mo}_2\text{Ga}_2\text{C}$  to  $\text{Li}_3\text{N}$ .

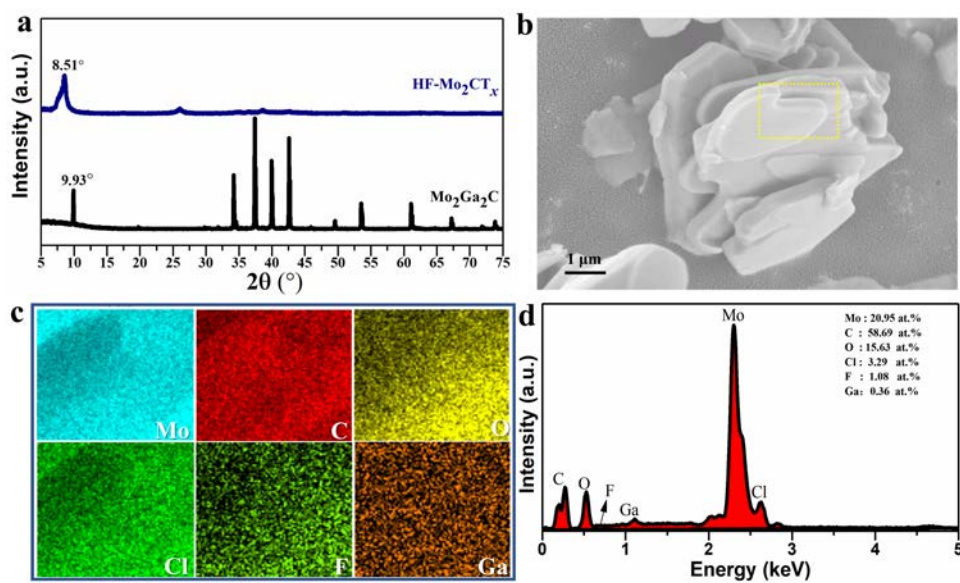

**Fig. S10** (a) XRD, (b) SEM, (c) EDS and (d) The corresponding atomic percentage distribution of elements of HF-Mo<sub>2</sub>CT<sub>x</sub> samples by HF etching.

The characteristic peak of (002) for HF-Mo<sub>2</sub>CT<sub>x</sub> samples shifted lower angle (8.51°) from 9.93° of Mo<sub>2</sub>Ga<sub>2</sub>C, which indicates the Mo<sub>2</sub>Ga<sub>2</sub>C was effectively etched.<sup>1, 2</sup> SEM-EDS shows that the elements of O, Cl and F are evenly distributed on the surface of HF-Mo<sub>2</sub>CT<sub>x</sub>. Among them, the relative content of O termination reached 15.63 at. %.

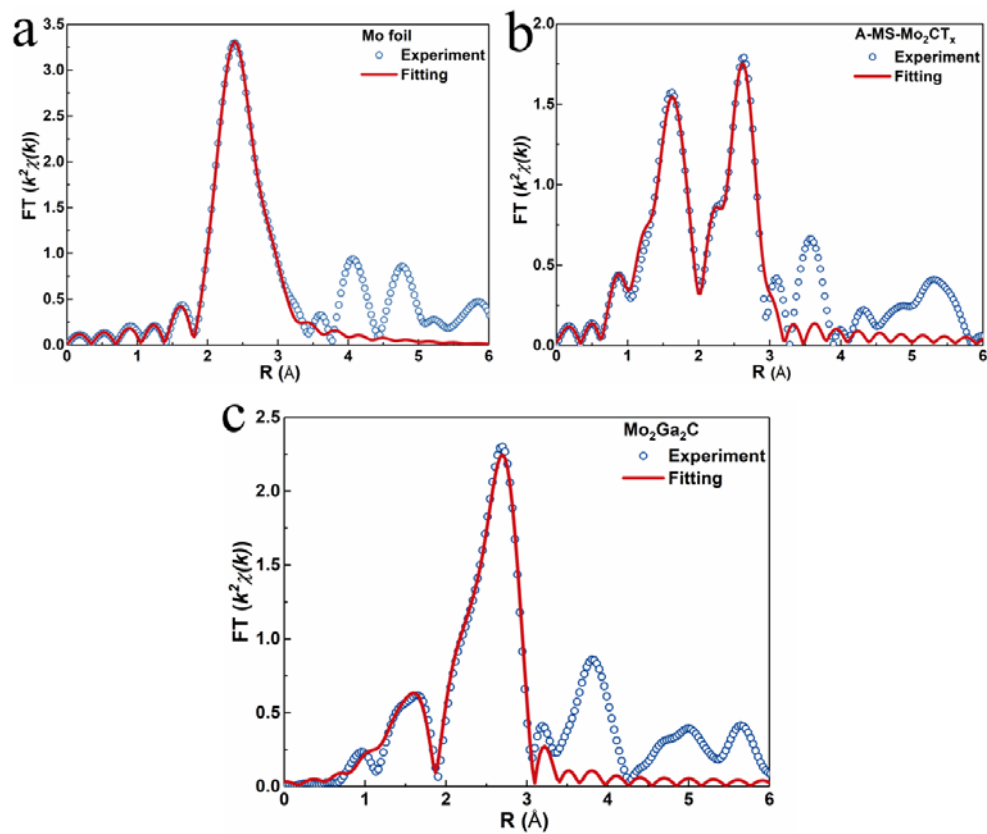

**Fig. S11** EXAFS fittings of (a) Mo foil, (b) A-MS-Mo<sub>2</sub>CT<sub>x</sub> and (c) Mo<sub>2</sub>Ga<sub>2</sub>C.

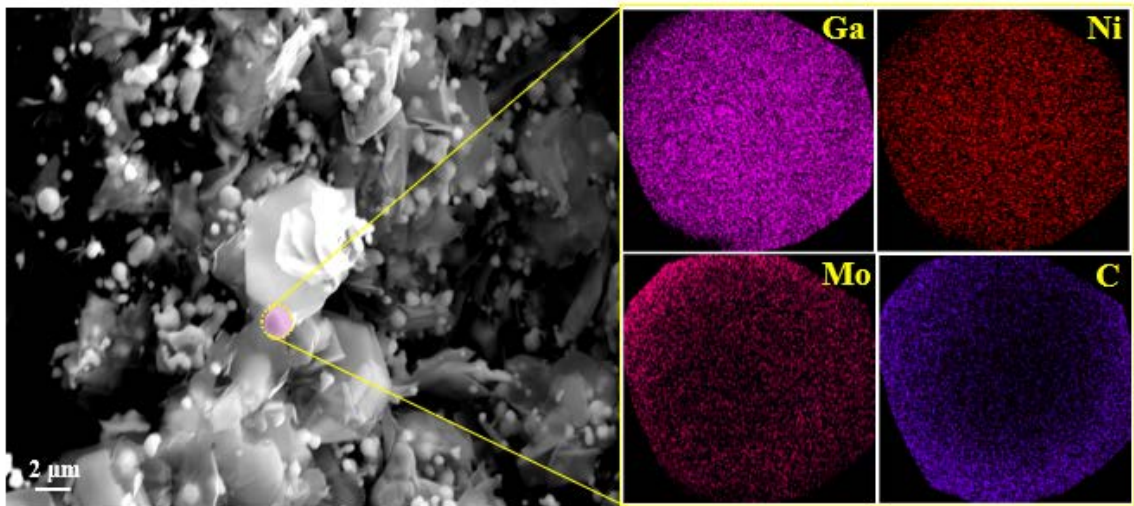

**Fig. S12** The surface morphology and elemental distribution of by-products GaNi<sub>3</sub> alloy from SEM-EDX.

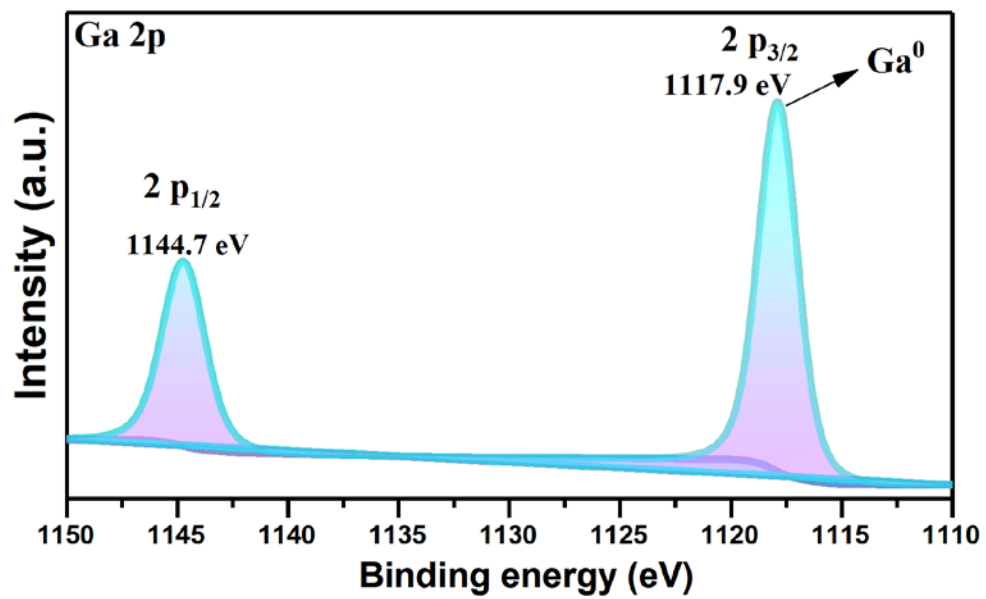

**Fig. S13** Ga 2p of Mo<sub>2</sub>Ga<sub>2</sub>C from XPS.

The peak located at 1117.9 eV was corresponded to Ga<sup>0</sup>, which is consistent with the analysis in the literature.<sup>3,4</sup>

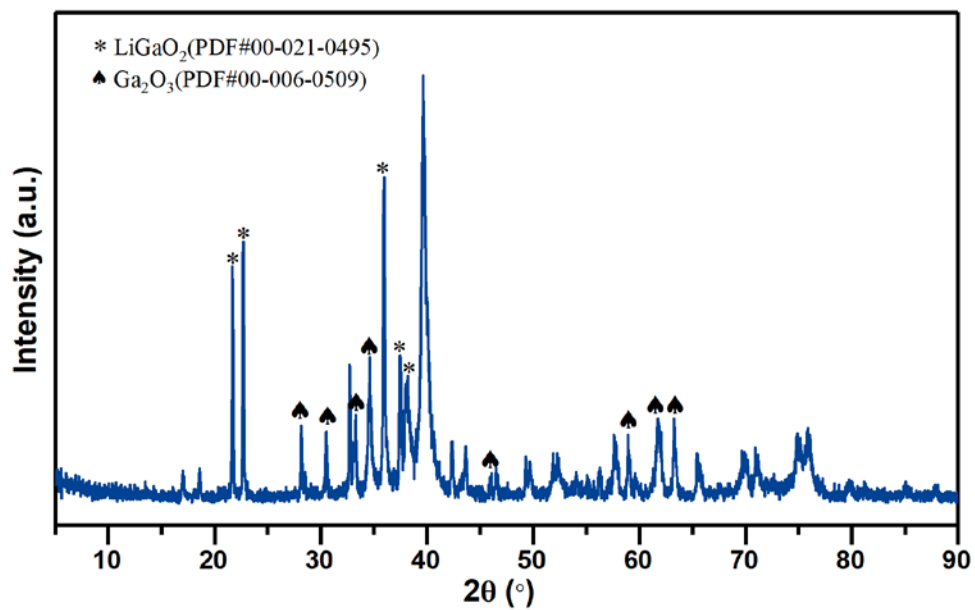

**Fig. S14** Products of the reaction between LiOH and Mo<sub>2</sub>Ga<sub>2</sub>C.

Considering that Li<sub>3</sub>N is easily hydrolyzed to LiOH ( $\text{Li}_3\text{N} + 3\text{H}_2\text{O} = 3\text{LiOH} + \text{NH}_3$ ), and LiOH is oxidizing, it will oxidize and etch Ga in Mo<sub>2</sub>Ga<sub>2</sub>C.

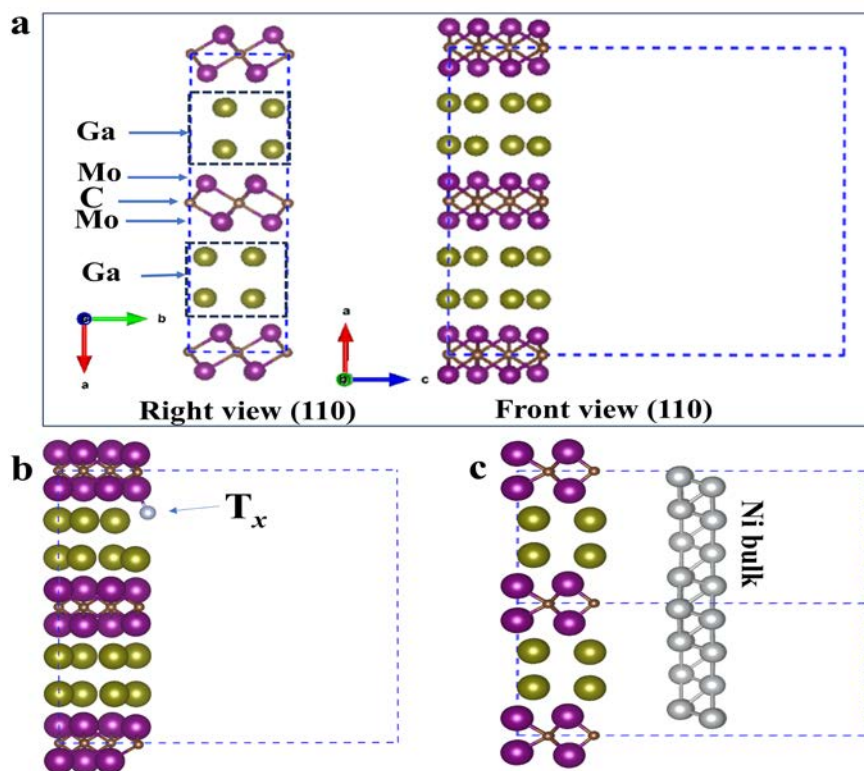

**Fig. S15** The simulation models of supercell structure for adsorption calculation and searching TS. (a) the [110] surfaces of  $\text{Mo}_2\text{Ga}_2\text{C}$  supercells, (b) the searching TS model on the [110] surface, (c) the adsorption calculation model on the [110] surface.

Considering that the removal of Ga atoms along the crystal surface in the [110] direction, and the formation of functional groups on the Mo surface in [110] direction during alloying processing.



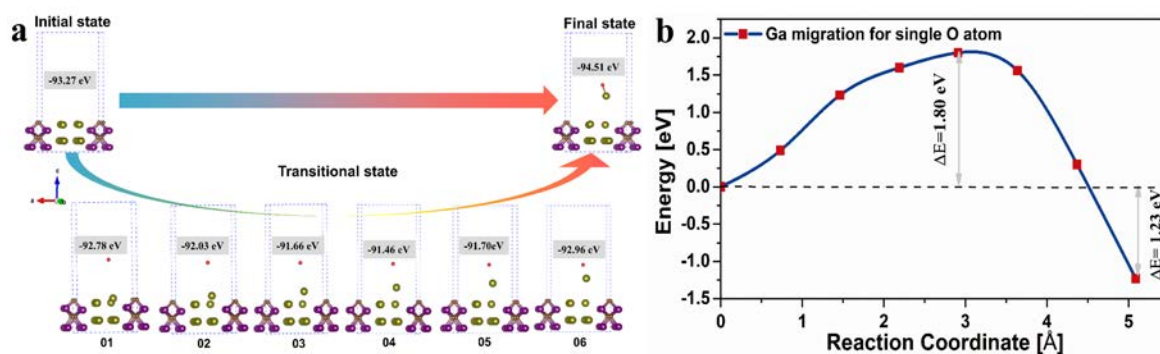

**Fig. S16** Transition state calculations of the process of migration of interlayer Ga atoms out of Mo<sub>2</sub>Ga<sub>2</sub>C layer and interaction with single O atom.

In view of the initial formation of Ga<sub>2</sub>O<sub>3</sub>, we also established the model of Ga atoms migration from Mo<sub>2</sub>Ga<sub>2</sub>C to form Ga-O bond with O atoms. The calculation results show that the reaction energy of Ga atom to form Ga-O bond in Ga<sub>2</sub>O<sub>3</sub> with O atom through migration is 1.8 eV. Therefore, it is reasonable to select "Mo<sub>2</sub>Ga<sub>2</sub>C + Ga<sub>2</sub>O<sub>3</sub> and Ga defects" as transition states to calculate the energy barrier of the oxidation path.

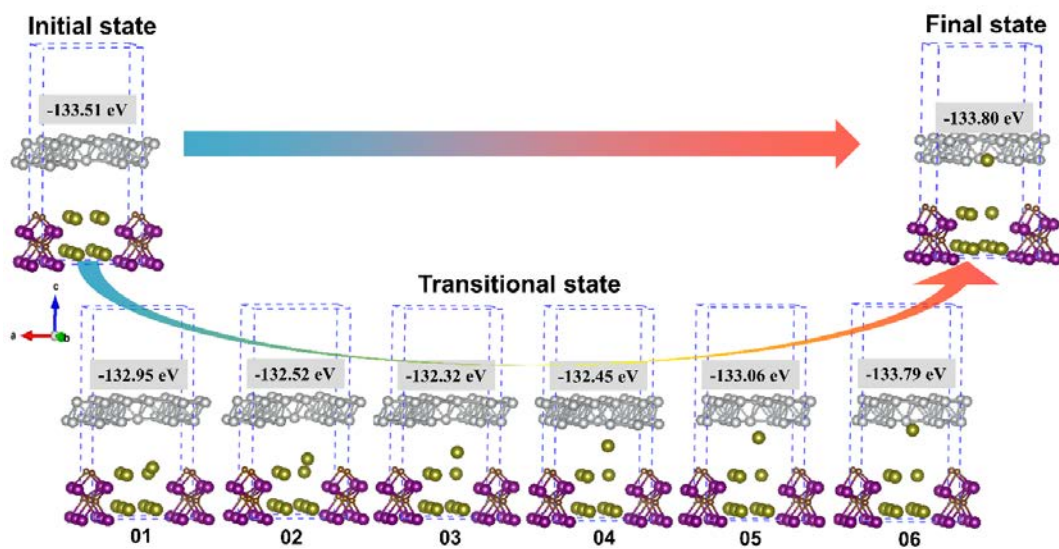

**Fig. S17** Transition state models of Ga alloying-etching process for (110) plane of heterostructure  $\text{Mo}_8\text{Ga}_8\text{C}_4$  and  $\text{Ni}_7^*$ .

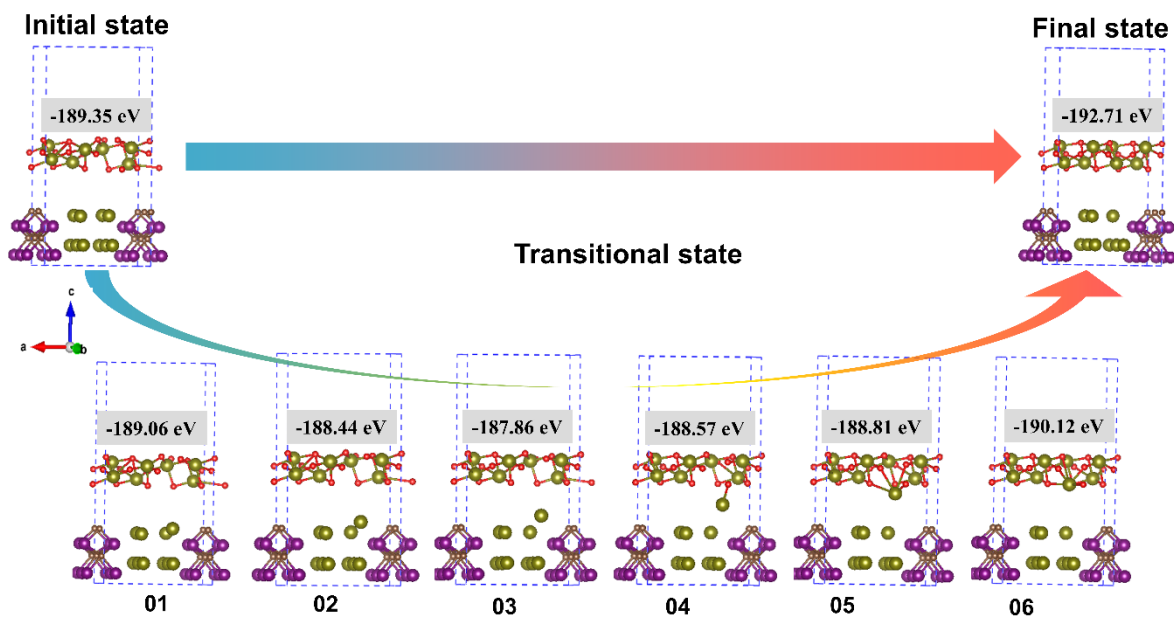

**Fig. S18** Transition state models of Ga redox-etching process for (110) plane of heterostructure  $\text{Mo}_8\text{Ga}_8\text{C}_4$  and  $\text{Ga}_3\text{O}_6^*$ .

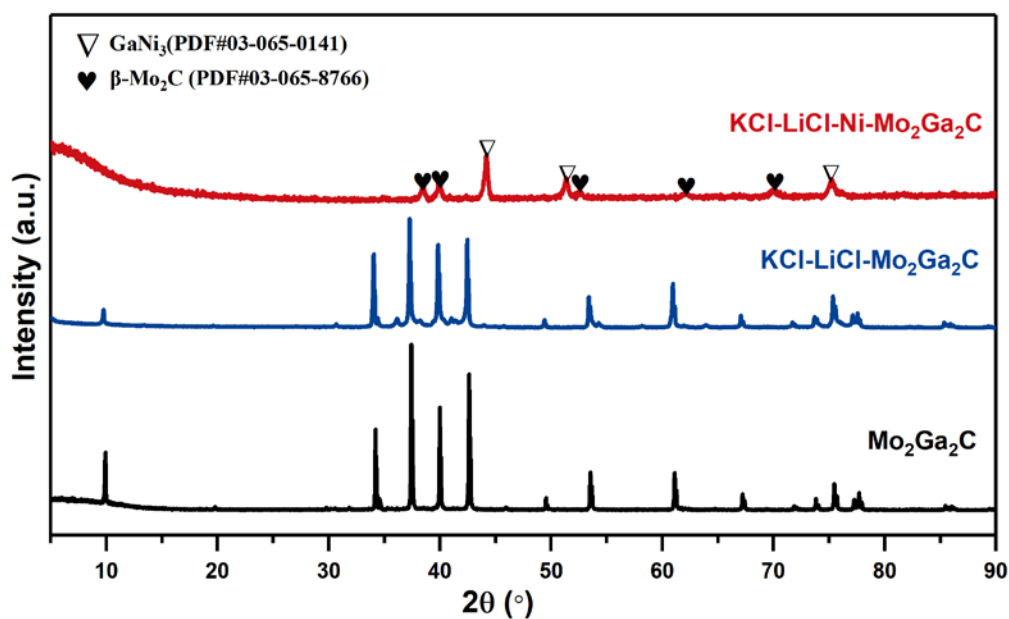

**Fig. S19** XRD of product components of KCl-LiCl-Ni-Mo<sub>2</sub>Ga<sub>2</sub>C without Li<sub>3</sub>N, KCl-LiCl-Mo<sub>2</sub>Ga<sub>2</sub>C and Mo<sub>2</sub>Ga<sub>2</sub>C at 700°C for 24 h.

For KCl-LiCl-Ni-Mo<sub>2</sub>Ga<sub>2</sub>C system without Li<sub>3</sub>N, the products are GaNi<sub>3</sub> and β-Mo<sub>2</sub>C. However, in the system of KCl-LiCl-Mo<sub>2</sub>Ga<sub>2</sub>C, the raw material Mo<sub>2</sub>Ga<sub>2</sub>C did not change significantly.

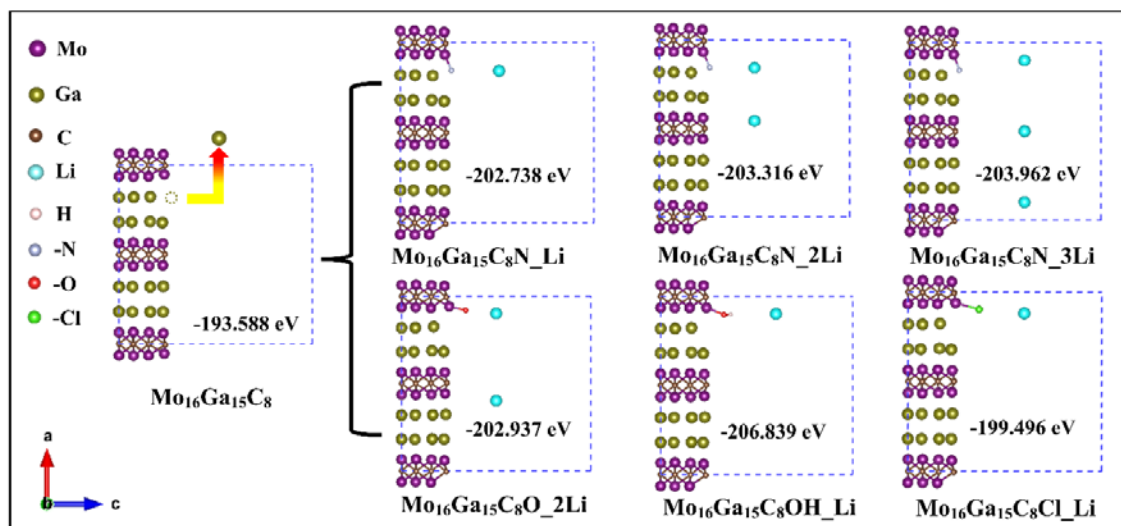

**Fig. S20** The surface adsorption model and adsorption energy of single termination.

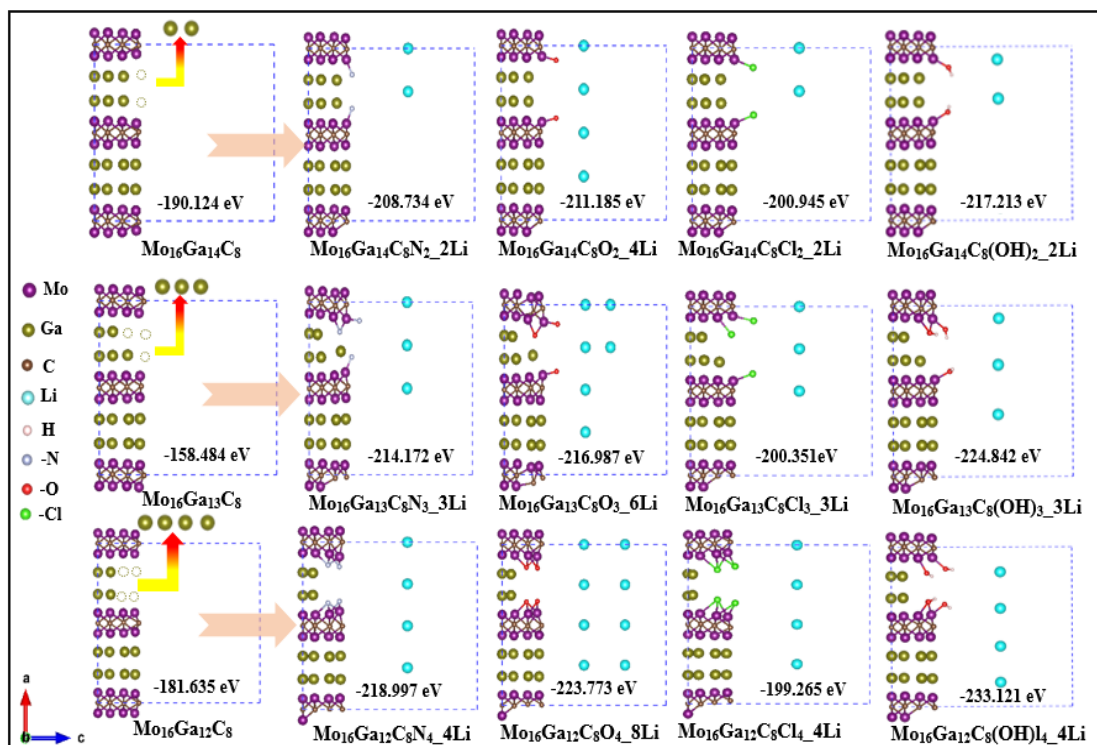

Fig. S21 The surface adsorption model and adsorption energy of different terminations.

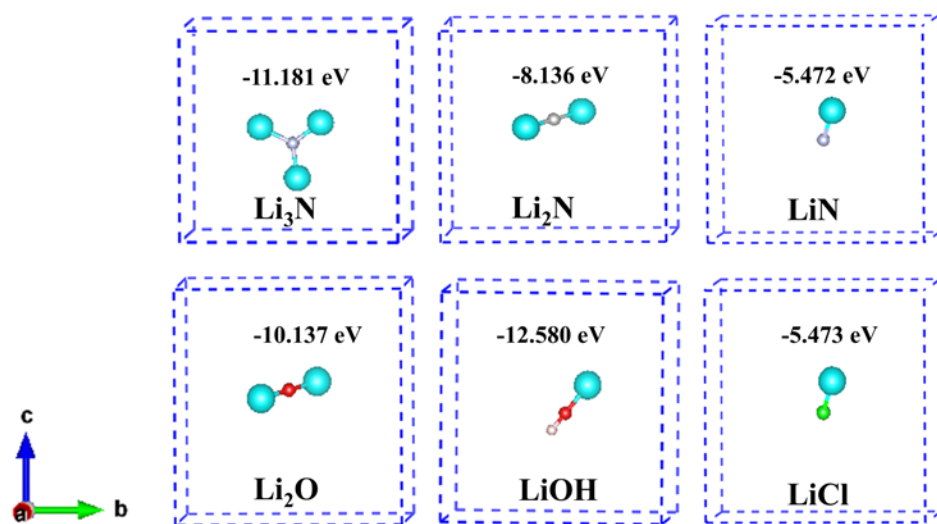

**Fig. S22** Calculation of different singlefunctional groups in a vacuum box.

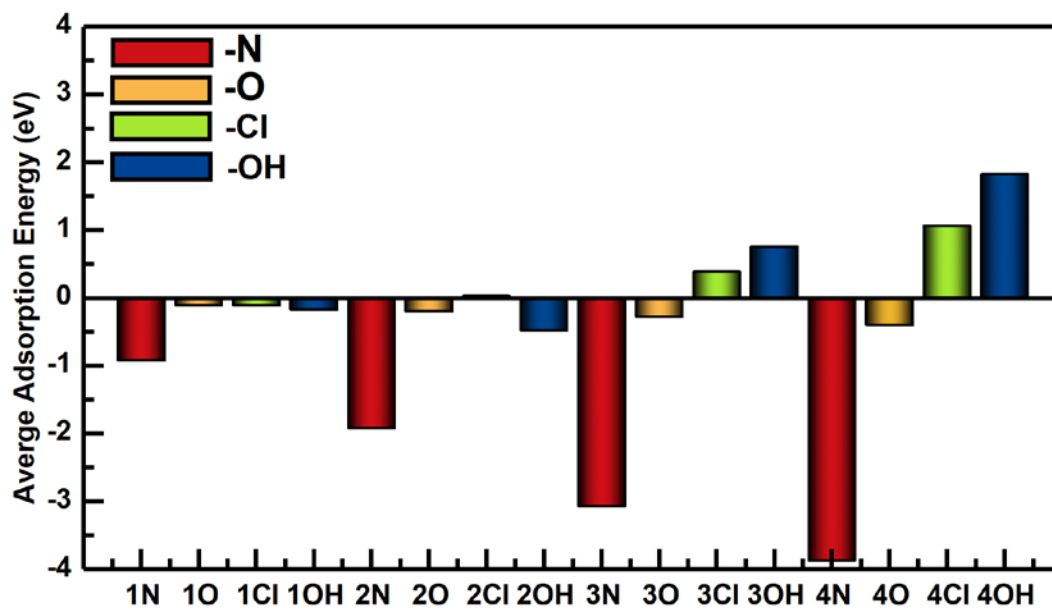

Fig. S23 The relationship between averagesurface adsorption energy and the number of adsorbed functional groups from LiN, Li<sub>2</sub>O, LiCl and LiOH, respectively.



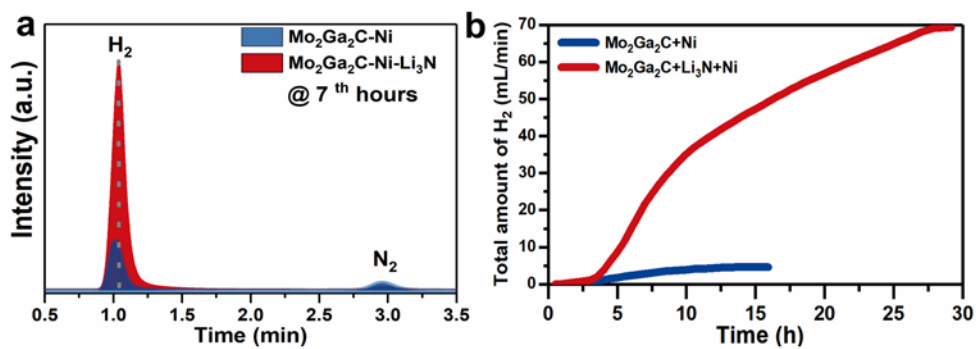

**Fig. S24** (a) The hydrogen production rate and (b) total hydrogen production during reaction of Mo<sub>2</sub>Ga<sub>2</sub>C-Ni-Li<sub>3</sub>N and Mo<sub>2</sub>Ga<sub>2</sub>C-Ni system in KCl-LiCl molten salt.

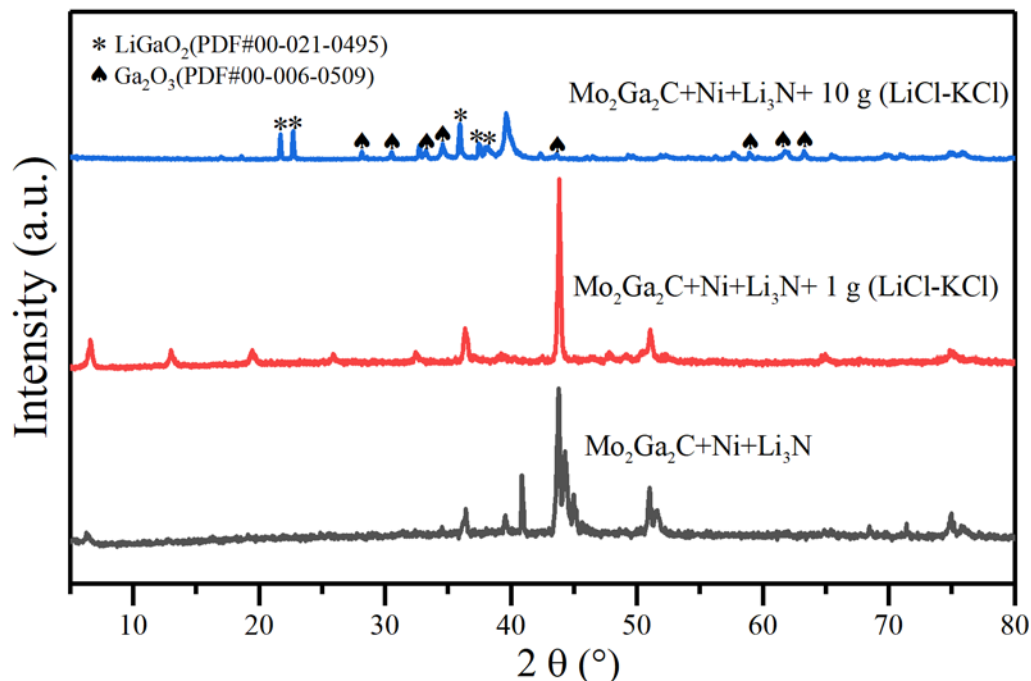

**Fig. S25** XRD of products of Ni- $\text{Li}_3\text{N}$ - $\text{Mo}_2\text{Ga}_2\text{C}$  with and without KCl-LiCl liquid medium at  $700^{\circ}\text{C}$  for 24 h.

When the contents of  $\text{Li}_3\text{N}$ ,  $\text{Mo}_2\text{Ga}_2\text{C}$  and iron ternary elements remained unchanged, and the LiCl-KCl eutectic salt increased from 1g to 10g,  $\text{Mo}_2\text{CT}_x$  products could not be obtained. This is probably because LiCl-KCl molten salt has a strong hygrometric property. With the increase of the mass of LiCl-KCl, the content of water adsorbed by LiCl-KCl will increase, and the amount of  $\text{Li}_3\text{N}$  converted to LiOH by reaction with water will increase. A large amount of LiOH will not only oxidize Ga to produce  $\text{Ga}_2\text{O}_3$ , but also oxidize  $\text{Mo}_2\text{C}$ , so no  $\text{Mo}_2\text{CT}_x$  product can be obtained. Without KCl-LiCl molten salt, the conversion rate of  $\text{Mo}_2\text{Ga}_2\text{C}$  to  $\text{Mo}_2\text{CT}_x$  products is considerably reduced. The results indicate that an optimal amount of LiCl-KCl is crucial for facilitating rapid migration, thereby enhancing the dissolution of reactants and diffusion rate of ions.

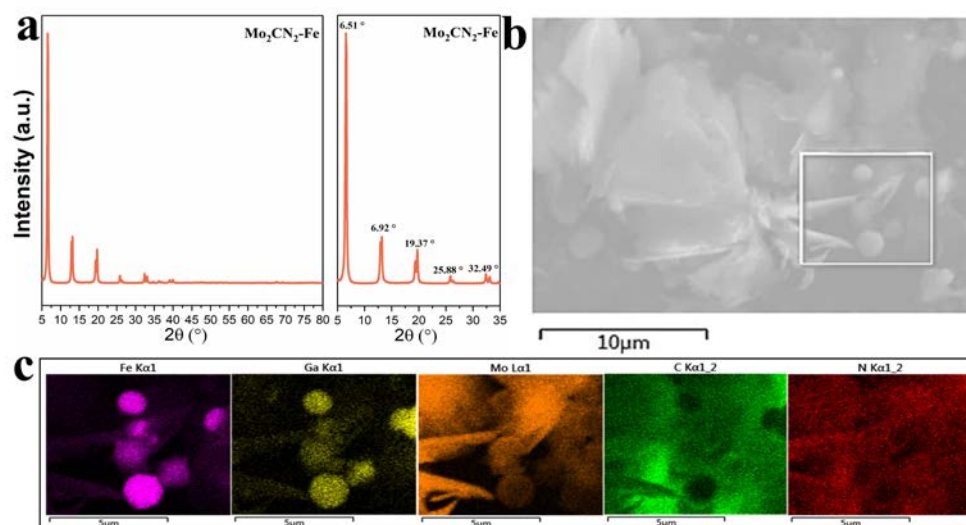

**Fig. S26** The etching product of  $\text{Mo}_2\text{Ga}_2\text{C}$  in  $\text{Fe-Li}_3\text{N-KCl-LiCl}$  molten salts. (a) XRD of samples after HCl washing, (b) SEM and (c) EDS of the corresponding initial product samples.

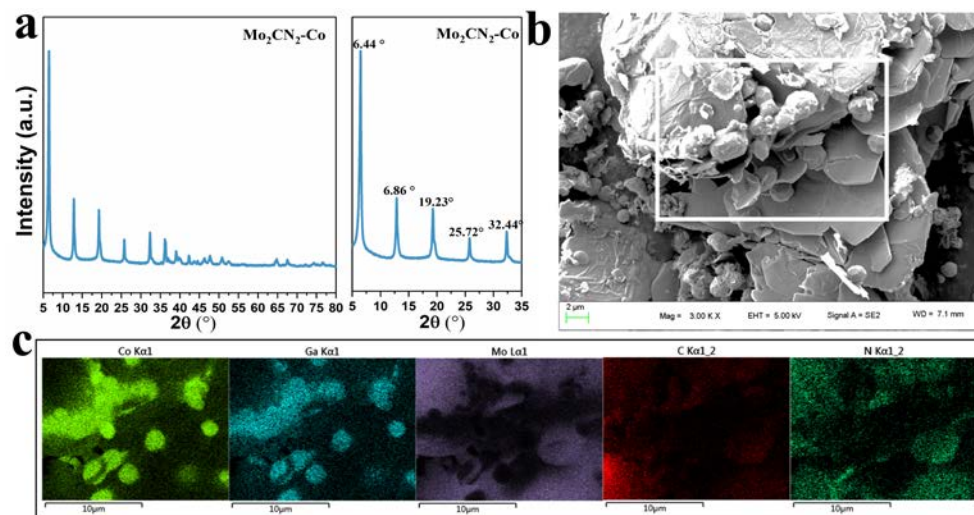

**Fig. S27** The etching product of  $\text{Mo}_2\text{Ga}_2\text{C}$  in  $\text{Co-Li}_3\text{N-KCl-LiCl}$  molten salt. (a) XRD of samples after HCl washing, (b) SEM and (c) EDS of the corresponding initial product samples.

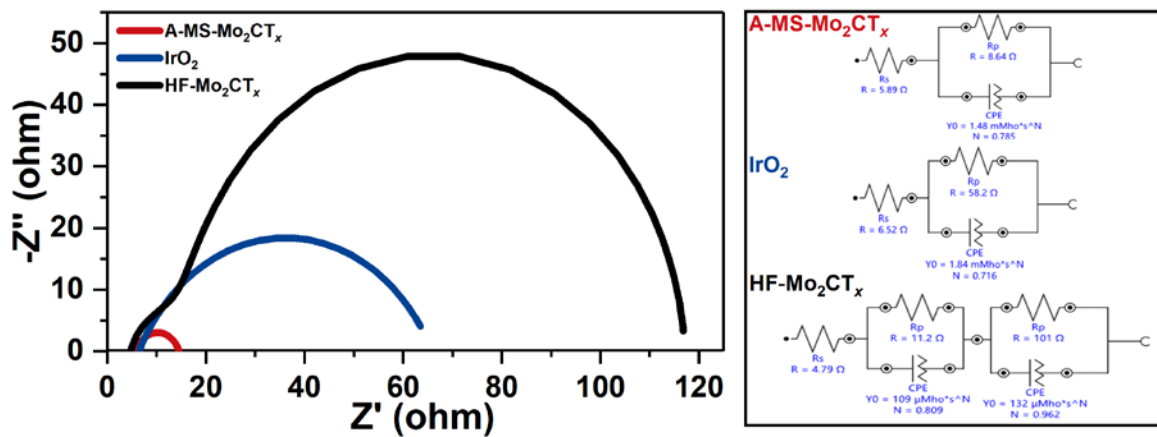

**Fig. S28** EIS and equivalent simulation circuits of A-MS-Mo<sub>2</sub>CT<sub>x</sub>, IrO<sub>2</sub> and HF-Mo<sub>2</sub>CT<sub>x</sub>, respectively.

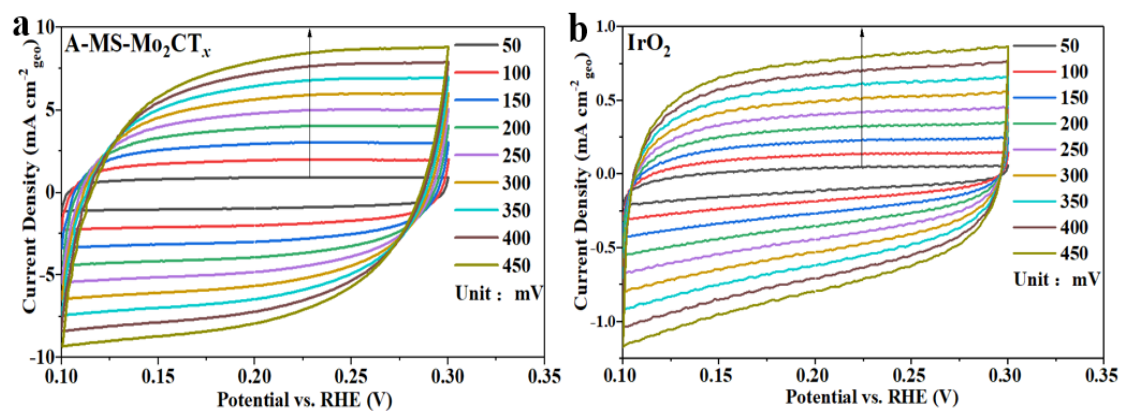

**Fig. S29** Electrochemical capacitance measurements for (a) A-MS-Mo<sub>2</sub>CT<sub>x</sub> and (b) IrO<sub>2</sub> by using cyclic voltammetry at increasing scan rates (50, 100, 150, 200, 250, 300, 350, 400 and 450 mV s<sup>-1</sup>).

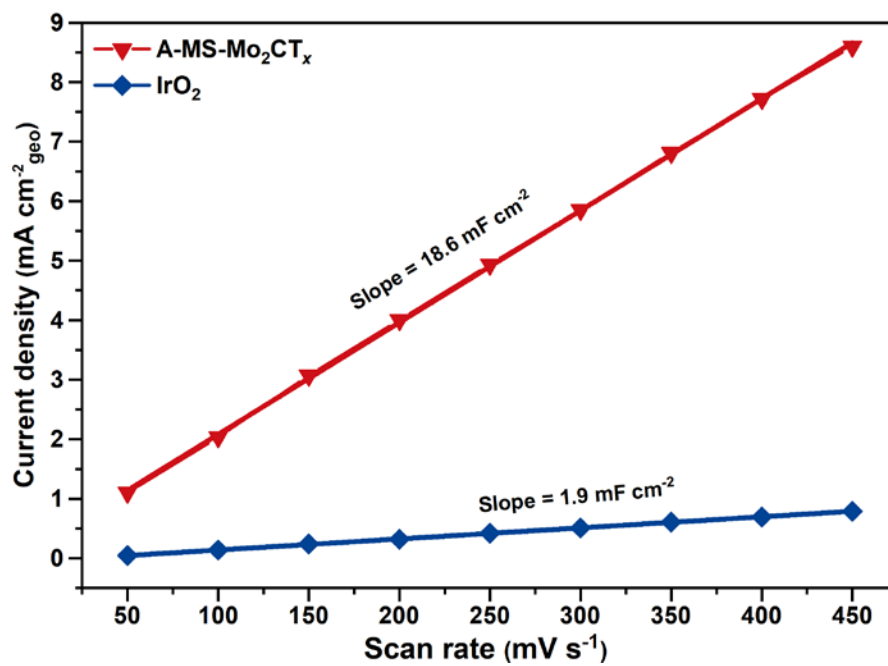

Fig. S30 Double-layer capacitances ( $C_{dl}$ ) of A-MS-Mo<sub>2</sub>CT<sub>x</sub> and IrO<sub>2</sub>.

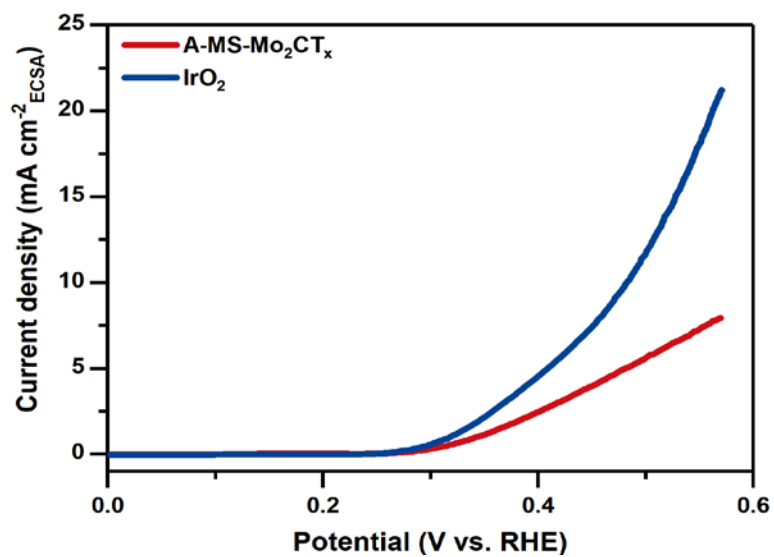

**Fig. S31** Electrocatalytic OER specific activity of A-MS-Mo<sub>2</sub>CT<sub>x</sub> and commercial IrO<sub>2</sub> in 1.0 M KOH electrolyte.



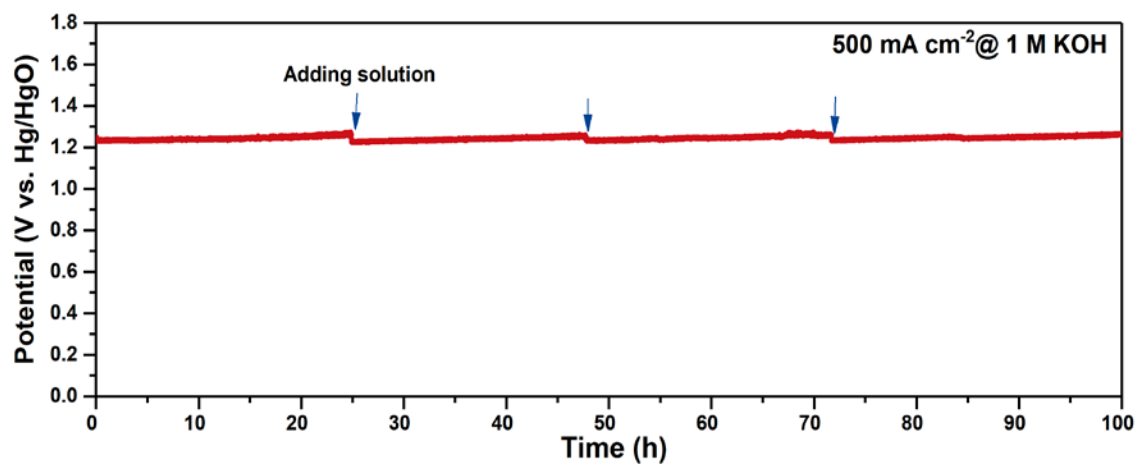

**Fig. S32** Long-term stability test of A-MS-Mo<sub>2</sub>CT<sub>x</sub> in alkaline electrolyte at current density of 500 mA cm<sup>-2</sup>.

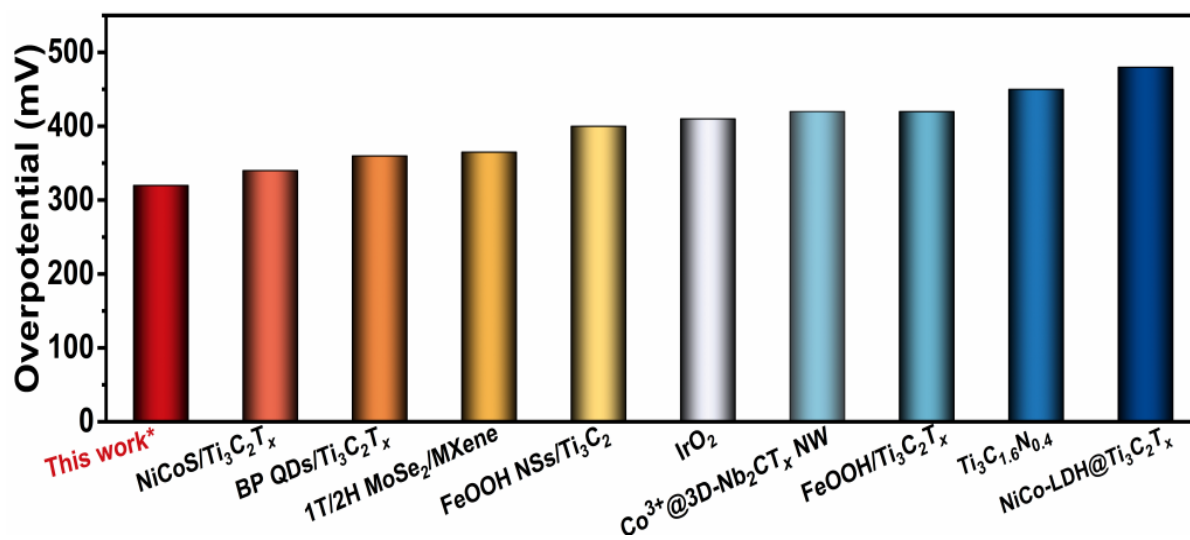

**Fig. S33** Overpotentials of reported MXene-based catalysts at the current density of 10 mA cm<sup>-2</sup> in 1 M KOH.<sup>5-11</sup>

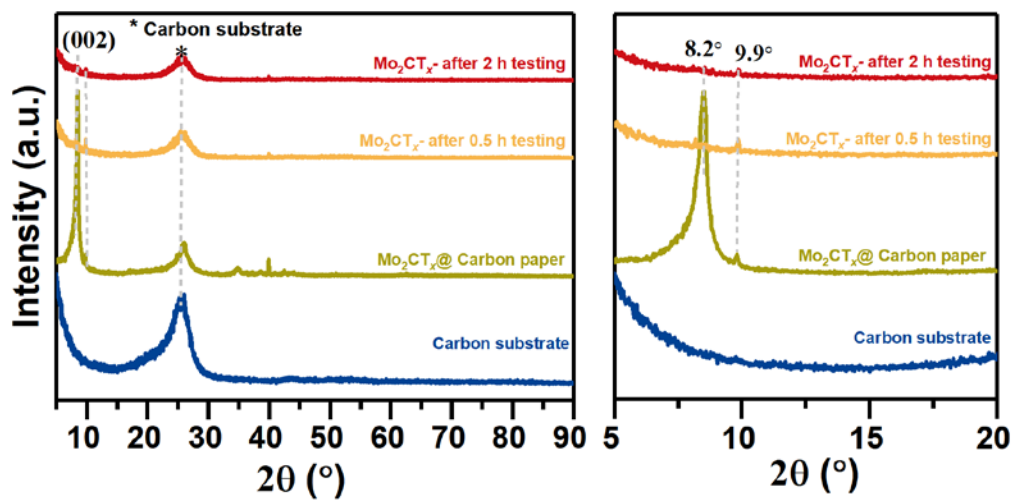

**Fig. S34** Ex situ XRD characterization of Mo<sub>2</sub>CT<sub>x</sub> at 10 mA cm<sup>-2</sup> current density and different timetesting process. Due to the poor stability of Mo<sub>2</sub>CT<sub>x</sub>, the testing time is limited to 2h.

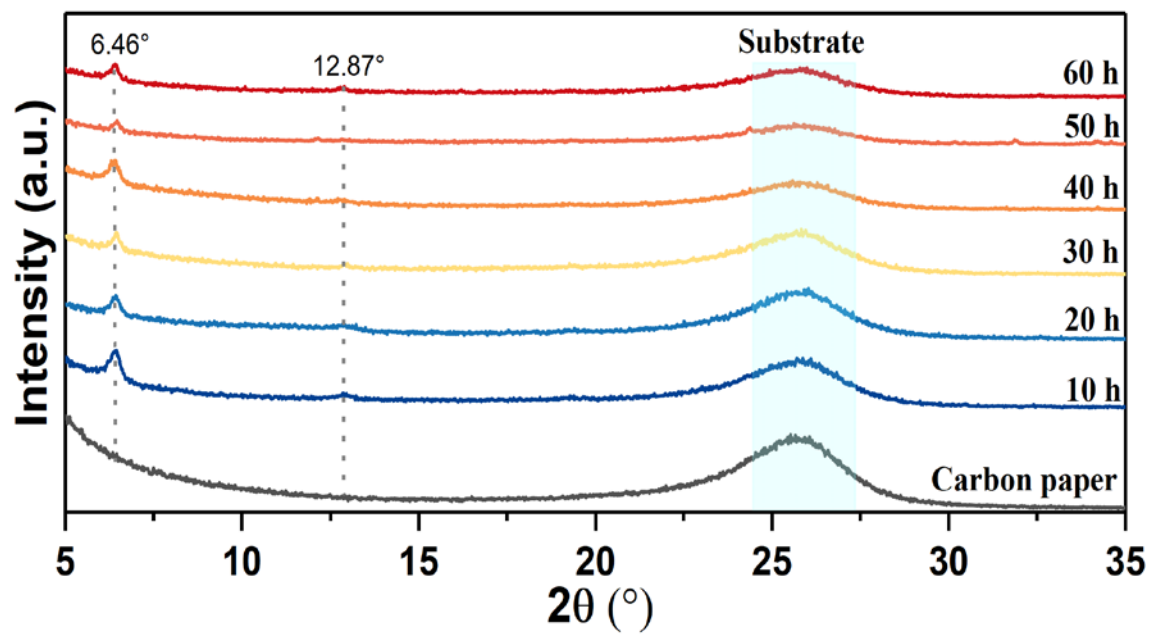

Fig. S35 Ex situ XRD characterization of A-MS-Mo<sub>2</sub>CT<sub>x</sub> at 10 mA cm<sup>-2</sup> current density during different time testing process.

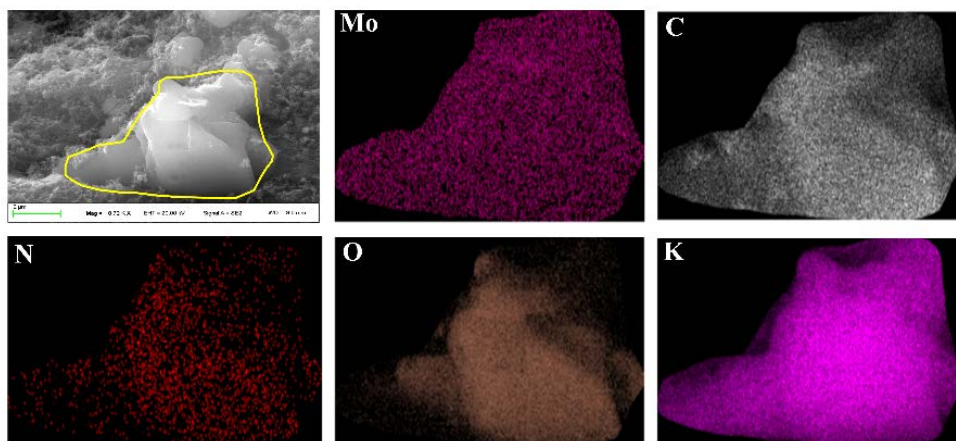

**Fig.S36** SEM and EDS of A-MS-Mo<sub>2</sub>CT<sub>x</sub> after long-term testing at 500 mA cm<sup>-2</sup>.

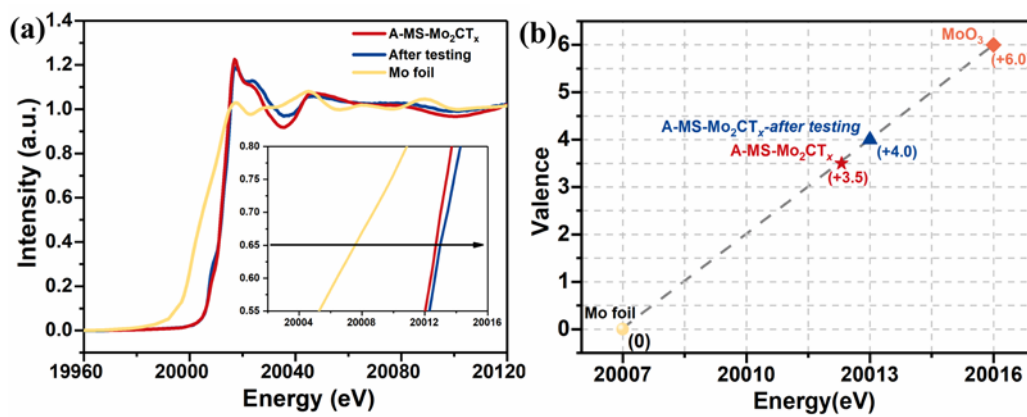

**Fig. S37**(a) Normalized XANES spectra of A-MS-Mo<sub>2</sub>CT<sub>x</sub> after long-term testing at current density of 500mA cm<sup>-2</sup>, (b) the fitted average valence state of Mo.

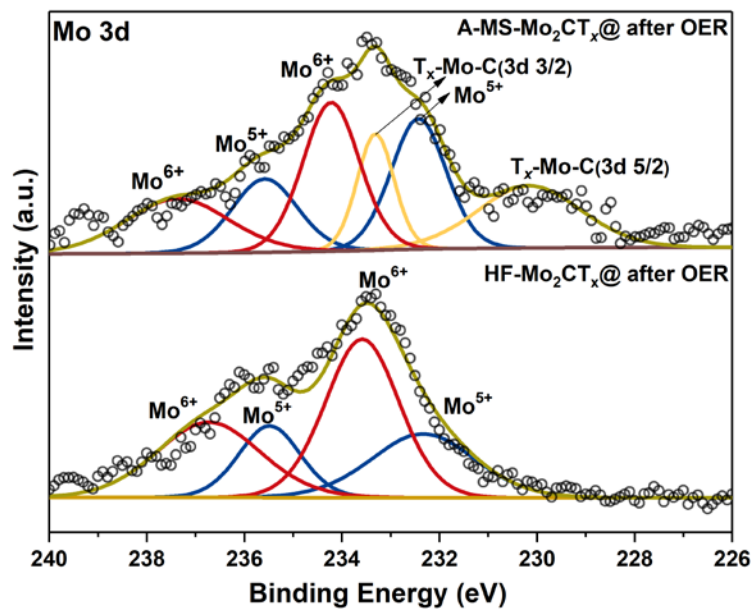

**Fig. S38** Mo 3d XPS spectra of A-MS-Mo<sub>2</sub>CT<sub>x</sub> and HF-Mo<sub>2</sub>CT<sub>x</sub> after OER.

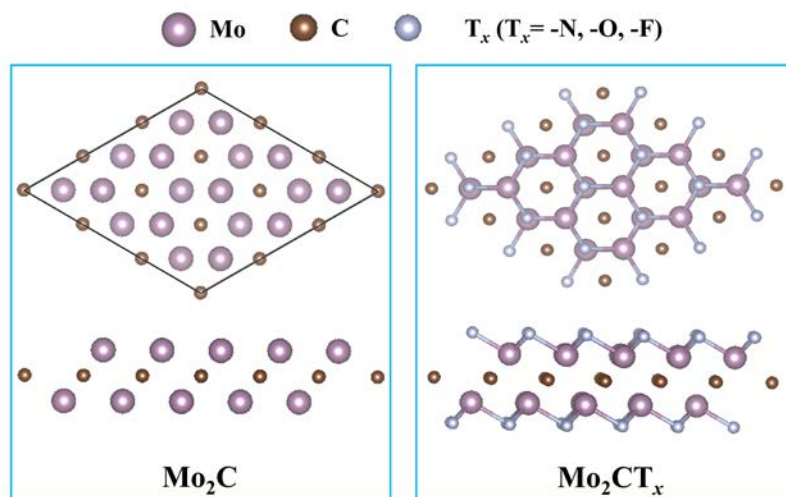

**Fig. S39** Model structures of Mo-based surfaces containing different groups.



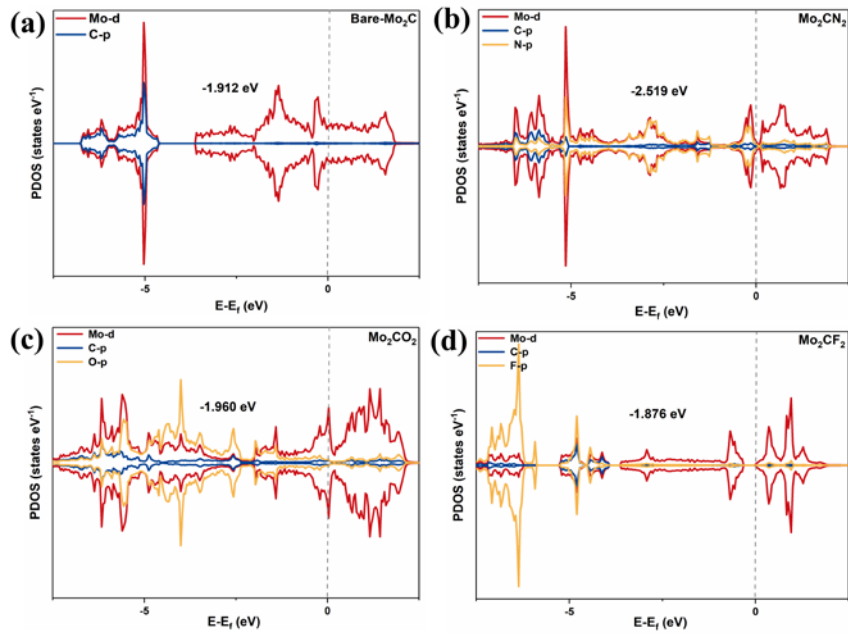

**Fig. S40** PDOS and d-band centre of Mo-based MXene without/with different functional groups, (a)  $\text{Mo}_2\text{C}$ , (b)  $\text{Mo}_2\text{CN}_2$ , (c)  $\text{Mo}_2\text{CO}_2$ , (d)  $\text{Mo}_2\text{CF}_2$ .

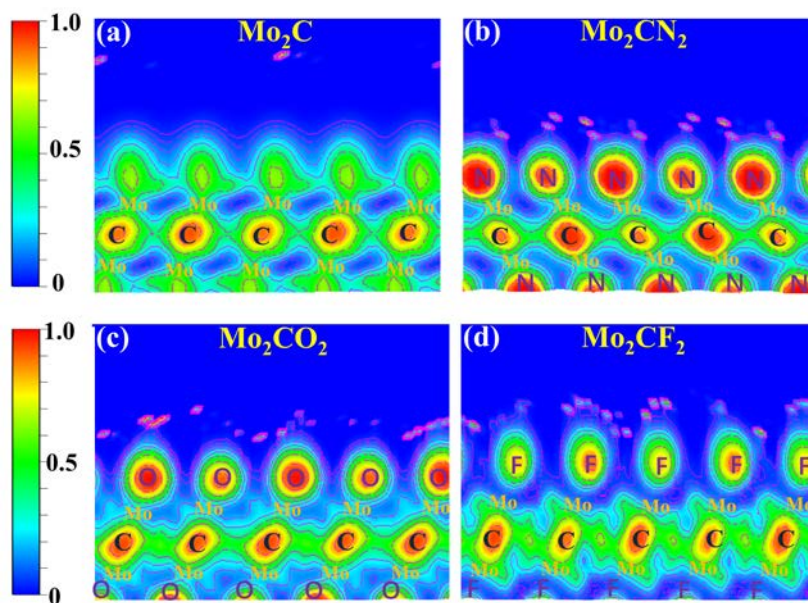

**Fig. S41** Electron Localization Function (ELF) of Mo-based MXene without/with different functional groups, (a)  $\text{Mo}_2\text{C}$ , (b)  $\text{Mo}_2\text{CN}_2$ , (c)  $\text{Mo}_2\text{CO}_2$ , (d)  $\text{Mo}_2\text{CF}_2$ .

**Table S1.** Relative element contents (at.%) of A-MS-Mo<sub>2</sub>CT<sub>x</sub> and Mo<sub>2</sub>Ga<sub>2</sub>C detected by XPS measurement.

| Element concentration (at. %)        | Mo (3d) | C (1s) | Ga (2p) | O (1s) | N (1s) |
|--------------------------------------|---------|--------|---------|--------|--------|
| A-MS-Mo <sub>2</sub> CT <sub>x</sub> | 13.30   | 36.40  | 1.63    | 34.71  | 16.93  |
| Mo <sub>2</sub> Ga <sub>2</sub> C    | 13.00   | 32.90  | 17.56   | 36.56  | 0      |

**Table S2.** Deconvolution results of the high-resolution XPS spectrum of the Mo 3d region for Mo<sub>2</sub>Ga<sub>2</sub>C and A-MS-Mo<sub>2</sub>CT<sub>x</sub>.

| Mo <sub>2</sub> Ga <sub>2</sub> C    | BE (eV)       | FWHM (eV)   | Fraction(%) | Assigned to      |
|--------------------------------------|---------------|-------------|-------------|------------------|
| Mo 3d                                | 227.8 (230.9) | 0.62 (0.78) | 28.23       | Mo-C             |
|                                      | 228.8 (232.0) | 2.00 (2.00) | 43.34       | Mo <sup>4+</sup> |
|                                      | 232.2 (235.4) | 2.07 (2.00) | 28.43       | Mo <sup>5+</sup> |
| A-MS-Mo <sub>2</sub> CT <sub>x</sub> | BE (eV)       | FWHM (eV)   | Fraction(%) | Assigned to      |
| Mo 3d                                | 229.2 (232.4) | 1.07 (1.15) | 86.95       | N-Mo-C           |
|                                      | 232.0 (235.1) | 1.42 (1.50) | 13.05       | Mo <sup>5+</sup> |

**Table S3.** Deconvolution results of the high-resolution XPS spectrum of the C 1s region for A-MS-Mo<sub>2</sub>CT<sub>x</sub>.

| Mo <sub>2</sub> Ga <sub>2</sub> C    | BE (eV) | FWHM (eV) | Fraction(%) | Assigned to |
|--------------------------------------|---------|-----------|-------------|-------------|
| C 1s                                 | 283.3   | 1.22      | 17.45       | Mo-C        |
|                                      | 284.8   | 1.28      | 52.98       | C-C         |
|                                      | 285.7   | 2.0       | 22.19       | C-O         |
|                                      | 288.7   | 2.0       | 7.07        | C=O         |
| A-MS-Mo <sub>2</sub> CT <sub>x</sub> | BE (eV) | FWHM (eV) | Fraction(%) | Assigned to |
| C 1s                                 | 283.5   | 1.22      | 19.26       | Mo-C        |
|                                      | 284.8   | 1.33      | 56.76       | C-C         |
|                                      | 286.5   | 1.67      | 20.29       | C-N         |
|                                      | 289.0   | 1.33      | 3.07        | C=O         |

**Table S4.** Deconvolution results of the high-resolution XPS spectrum of the N 1s region for A-MS-Mo<sub>2</sub>CT<sub>x</sub>.

| A-MS-Mo <sub>2</sub> CT <sub>x</sub> | BE(eV) | FWHM (eV) | Fraction (%) | Assigned to |
|--------------------------------------|--------|-----------|--------------|-------------|
| N 1s                                 | 395.4  | 2.58      | 58.34        | Mo 2p       |
|                                      | 397.2  | 0.98      | 20.46        | Mo-N        |
|                                      | 398.0  | 1.07      | 13.28        | Pyridinic N |
|                                      | 399.2  | 0.93      | 4.26         | Pyrrolic N  |
|                                      | 400.3  | 1.2       | 3.66         | Graphitic N |

**Table S5.** Corresponding fit parameters for Mo foil, A-MS-Mo<sub>2</sub>CT<sub>x</sub> and Mo<sub>2</sub>Ga<sub>2</sub>C.

| Sample                               | bond type | CN*     | R (Å)     | $\sigma^2(10^{-3}\text{Å}^2)^{**}$ | R factor |
|--------------------------------------|-----------|---------|-----------|------------------------------------|----------|
| Mo foil                              | Mo-Mo1    | 8       | 2.72±0.01 | 3.3±0.5                            | 0.002    |
|                                      | Mo-Mo2    | 6       | 3.15±0.01 | 3.1±0.7                            |          |
| A-MS-Mo <sub>2</sub> CT <sub>x</sub> | Mo-N/C    | 5.9±0.7 | 2.11±0.01 | 4.7±1.4                            | 0.012    |
|                                      | Mo-Mo1    | 1.9±0.8 | 2.79±0.02 | 3.9±2.0                            |          |
|                                      | Mo-Mo2    | 5.0±1.3 | 3.10±0.01 | 4.6±1.2                            |          |
| Mo <sub>2</sub> Ga <sub>2</sub> C    | Mo-C      | 3.0±0.2 | 2.08±0.01 | 4.2±1.9                            | 0.004    |
|                                      | Mo-Ga     | 3.6±0.4 | 2.73±0.01 | 4.2±0.7                            |          |
|                                      | Mo-Mo     | 4.9±0.5 | 3.01±0.01 | 2.9±0.5                            |          |

\* CN: coordination number;  $S_0^2$  was fixed to be 0.91 from Mo-foil.

\*\*  $\sigma^2$ : Debye–Waller factors.

**Table S6.** Fitted impedance parameters of A-MS-Mo<sub>2</sub>CT<sub>x</sub>, IrO<sub>2</sub> and HF-Mo<sub>2</sub>CT<sub>x</sub>, respectively.

| Samples                              | Series resistance $R_s$ ( $\Omega$ ) | Charge-transfer resistance $R1_{ct}$ ( $\Omega$ ) | Charge-transfer resistance $R2_{ct}$ ( $\Omega$ ) |
|--------------------------------------|--------------------------------------|---------------------------------------------------|---------------------------------------------------|
| A-MS-Mo <sub>2</sub> CT <sub>x</sub> | 5.89                                 | -                                                 | 8.6                                               |
| IrO <sub>2</sub>                     | 6.52                                 | -                                                 | 58.2                                              |
| HF-Mo <sub>2</sub> CT <sub>x</sub>   | 4.79                                 | 11.2                                              | 101                                               |



**Table S7** Deconvolution results of the high-resolution XPS spectrum of the Mo3d region before and after OER

| A-MS-Mo <sub>2</sub> CT <sub>x</sub> after OER | BE (eV)         | FWHM (eV)   | Fraction(%)  | Assigned to          |
|------------------------------------------------|-----------------|-------------|--------------|----------------------|
| Mo 3d                                          | 230.16 (233.31) | 2.50 (0.89) | 29.20        | T <sub>x</sub> -Mo-C |
|                                                | 232.43 (235.58) | 1.33 (1.58) | 32.60        | Mo <sup>5+</sup>     |
|                                                | 234.22 (237.37) | 1.37 (2.50) | 38.20        | Mo <sup>6+</sup>     |
| HF-Mo <sub>2</sub> CT <sub>x</sub> after OER   | BE (eV)         | FWHM (eV)   | Fraction (%) | Assigned to          |
| Mo 3d                                          | 232.33(235.481) | 2.50 (1.49) | 36.17        | Mo <sup>5+</sup>     |
|                                                | 233.58 (236.73) | 1.78(2.50)  | 63.83        | Mo <sup>6+</sup>     |

**Table S8.** The bond length of different functional group structures

| Type                            | bond | bond length (Å) |
|---------------------------------|------|-----------------|
| Mo <sub>2</sub> C               | Mo-C | 2.20            |
| Mo <sub>2</sub> CN <sub>2</sub> | Mo-N | 2.05            |
| Mo <sub>2</sub> CO <sub>2</sub> | Mo-O | 2.10            |
| Mo <sub>2</sub> CF <sub>2</sub> | Mo-F | 2.30            |

## References

- 1.E. B. Deeva, A. Kurlov, P. M. Abdala, D. Lebedev, S. M. Kim, C. P. Gordon, A. Tsoukalou, A. Fedorov and C. R. Müller, *Chem. Mater.*, 2019, **31**, 4505-4513.
- 2.C. Wang, H. Shou, S. Chen, S. Wei, Y. Lin, P. Zhang, Z. Liu, K. Zhu, X. Guo and X. Wu, *Adv. Mater.*, 2021, **33**, 2101015.
- 3.F. Scharmann, G. Cherkashinin, V. Breternitz, C. Knedlik, G. Hartung, T. Weber and J. Schaefer, *Interfaces and thin films*, 2004, **36**, 981-985.
- 4.L.-S. Hsu, *Surf. Sci. Spectra*, 2000, **7**, 122-133.
- 5.H. Zou, B. He, P. Kuang, J. Yu and K. Fan, *ACS Appl. Mater.*, 2018, **10**, 22311-22319.
- 6.X.-D. Zhu, Y. Xie and Y.-T. Liu, *J. Mater. Chem. A*, 2018, **6**, 21255-21260.
- 7.N. Li, Y. Zhang, M. Jia, X. Lv, X. Li, R. Li, X. Ding, Y.-Z. Zheng and X. Tao, *Electrochim. Acta*, 2019, **326**, 134976.
- 8.K. Zhao, X. Ma, S. Lin, Z. Xu and L. Li, *ChemistrySelect*, 2020, **5**, 1890-1895.
- 9.S. Y. Pang, W. F. Io, L. W. Wong, J. Zhao and J. Hao, *Adv. Science*, 2020, **7**, 1903680.
- 10.N. Li, S. Wei, Y. Xu, J. Liu, J. Wu, G. Jia and X. Cui, *Electrochim. Acta*, 2018, **290**, 364-368.
- 11.Y. Tang, C. Yang, Y. Tian, Y. Luo, X. Yin and W. Que, *Nanoscale Adv.*, 2020, **2**, 1187-1194.
